# Supplementary material for: Sleep Quality and Duration in Children That Consume Caffeine: Impact of Dose and Genetic Variation in ADORA2A and CYP1A
Source: MDPI journal article supplement (doi:10.3390/genes14020289), 2023-01-22
Supplement: s1 [file s1]

**Sleep quality and duration in children that consume caffeine: Impact of dose and genetic variation in *ADORA2A* and *CYP1A***

## SUPPLEMENTARY MATERIALS

**Table S1.** Standardized caffeine content by type of beverage

| Category       | Standard conversion               | Caffeine (mg) | Source                                                                                                                                                                          |
|----------------|-----------------------------------|---------------|---------------------------------------------------------------------------------------------------------------------------------------------------------------------------------|
| Coffee         | 8oz Starbucks Medium Roast Coffee | 155           | <a href="https://globalassets.starbucks.com/assets/94fbcc2ab1e24359850fa1870fc988bc.pdf">https://globalassets.starbucks.com/assets/94fbcc2ab1e24359850fa1870fc988bc.pdf</a>     |
| Espresso drink | USDA 1oz Espresso Shot            | 64            | <a href="https://fdc.nal.usda.gov/">https://fdc.nal.usda.gov/</a>                                                                                                               |
| Tea            | USDA 8oz Ready to drink Black Tea | 47            | <a href="https://fdc.nal.usda.gov/">https://fdc.nal.usda.gov/</a>                                                                                                               |
| Soda           | 12oz Pepsi                        | 38            | <a href="https://www.pepsicobeveragefacts.com/">https://www.pepsicobeveragefacts.com/</a>                                                                                       |
| Energy drink   | 8oz Redbull                       | 75.7          | <a href="https://www.redbull.com/ca-en/energydrink/red-bull-energy-drink-ingredients-list">https://www.redbull.com/ca-en/energydrink/red-bull-energy-drink-ingredients-list</a> |

**Table S2.** Concordance between self-reported ethnicity and genomic-derived ancestry

| Self-report ethnicity | Genomic derived ancestry, % |             |            |            |                 |
|-----------------------|-----------------------------|-------------|------------|------------|-----------------|
|                       | EUR (n = 3835)              | AFR (n=914) | EAS (n=60) | AMR (n=52) | Admixed (n=810) |
| White                 | 76.7                        | 0.0         | 0.0        | 1.9        | 0.6             |
| Black                 | 0.3                         | 91.5        | 0.0        | 0.0        | 5.9             |
| Asian                 | 0.4                         | 0.0         | 80.0       | 0.0        | 2.6             |
| Hispanic              | 15.5                        | 1.5         | 1.7        | 96.2       | 63.0            |
| Other                 | 7.1                         | 7.0         | 18.3       | 1.9        | 27.9            |

**Table S3.** Binomial logistic regression models assessing the impact of ADORA2A and CYP1A genotypes on sleep duration and quality

|                                | Recommended Sleep Duration |             |                        | Disturbed Sleep Quality |             |                      |
|--------------------------------|----------------------------|-------------|------------------------|-------------------------|-------------|----------------------|
|                                | OR <sup>1</sup>            | 95% CI      | p                      | OR <sup>1</sup>         | 95% CI      | p                    |
| <b>ADORA2A model</b>           |                            |             |                        |                         |             |                      |
| rs5751876                      |                            |             |                        |                         |             |                      |
| T/T                            | reference                  |             |                        | reference               |             |                      |
| C/T                            | 1.01                       | 0.86 - 1.19 | 0.891                  | 1.01                    | 0.85 - 1.22 | 0.851                |
| C/C                            | 1.00                       | 0.84 - 1.20 | 0.988                  | 1.09                    | 0.90 - 1.34 | 0.352                |
| Caffeine intake (mg/kg/day)    | 0.85                       | 0.72 - 1.00 | 0.055                  | 1.09                    | 0.93 - 1.28 | 0.282                |
| rs5751876 x Caffeine           | 0.96                       | 0.76 - 1.20 | 0.694                  | 0.86                    | 0.68 - 1.01 | 0.233                |
| Gender                         |                            |             |                        |                         |             |                      |
| Girl                           | reference                  |             |                        | reference               |             |                      |
| Boy                            | 1.05                       | 0.94 - 1.17 | 0.375                  | 1.01                    | 0.89 - 1.13 | 0.875                |
| Concomitant Psychotropic Use   |                            |             |                        |                         |             |                      |
| No                             | reference                  |             |                        | reference               |             |                      |
| Yes                            | 0.73                       | 0.57 – 0.93 | 0.011                  | 1.89                    | 1.49 – 2.42 | 1.9x10 <sup>-7</sup> |
| <b>CYP1A model</b>             |                            |             |                        |                         |             |                      |
| rs2472297                      |                            |             |                        |                         |             |                      |
| C/C                            | reference                  |             |                        | reference               |             |                      |
| C/T                            | 1.00                       | 0.87 - 1.16 | 0.989                  | 1.03                    | 0.90 - 1.19 | 0.665                |
| T/T                            | 1.07                       | 0.76 - 1.52 | 0.692                  | 0.93                    | 0.66 - 1.33 | 0.725                |
| Caffeine intake (mg/kg/day)    | 0.81                       | 0.73 - 0.90 | 8.1 x 10 <sup>-5</sup> | 1.13                    | 1.02 - 1.25 | 0.018                |
| rs2472297 x Caffeine           | 1.06                       | 0.71 - 1.58 | 0.772                  | 0.76                    | 0.45 – 1.25 | 0.285                |
| Gender                         |                            |             |                        |                         |             |                      |
| Girl                           | reference                  |             |                        | reference               |             |                      |
| Boy                            | 1.05                       | 0.94 - 1.17 | 0.379                  | 1.01                    | 0.90 - 1.14 | 0.855                |
| Concomitant Psychotropic Use   |                            |             |                        |                         |             |                      |
| No                             | reference                  |             |                        | reference               |             |                      |
| Yes                            | 0.73                       | 0.57 – 0.93 | 0.011                  | 1.91                    | 1.50 – 2.43 | 1.3x10 <sup>-7</sup> |
| <b>CYP1A2 model</b>            |                            |             |                        |                         |             |                      |
| rs762551                       |                            |             |                        |                         |             |                      |
| C/C (*1/*1)                    | reference                  |             |                        | reference               |             |                      |
| C/A or A/A (*1/*1F or *1F/*1F) | 0.92                       | 0.74 -1.14  | 0.461                  | 1.12                    | 0.89 – 1.41 | 0.306                |
| Caffeine intake (mg/kg/day)    | 0.80                       | 0.57 – 0.93 | 6.9x10 <sup>-7</sup>   | 1.08                    | 0.99 – 1.18 | 0.084                |
| rs2472297 x Caffeine           | 1.21                       | 0.91 – 1.60 | 0.183                  | 0.99                    | 0.74 – 1.31 | 0.949                |
| Gender                         |                            |             |                        |                         |             |                      |
| Girl                           | reference                  |             |                        | reference               |             |                      |
| Boy                            | 1.05                       | 0.94 -1.17  | 0.370                  | 1.01                    | 0.89 – 1.14 | 0.881                |
| Concomitant Psychotropic Use   |                            |             |                        |                         |             |                      |

|     |           |             |       |           |             |                      |
|-----|-----------|-------------|-------|-----------|-------------|----------------------|
| No  | reference |             |       | reference |             |                      |
| Yes | 0.72      | 0.56 - 0.93 | 0.011 | 1.91      | 1.51 – 2.43 | 1.4x10 <sup>-7</sup> |

---

1 adjusted for caffeine intake, concomitant psychotropic use, gender, and population stratification by including the first 10 principal components

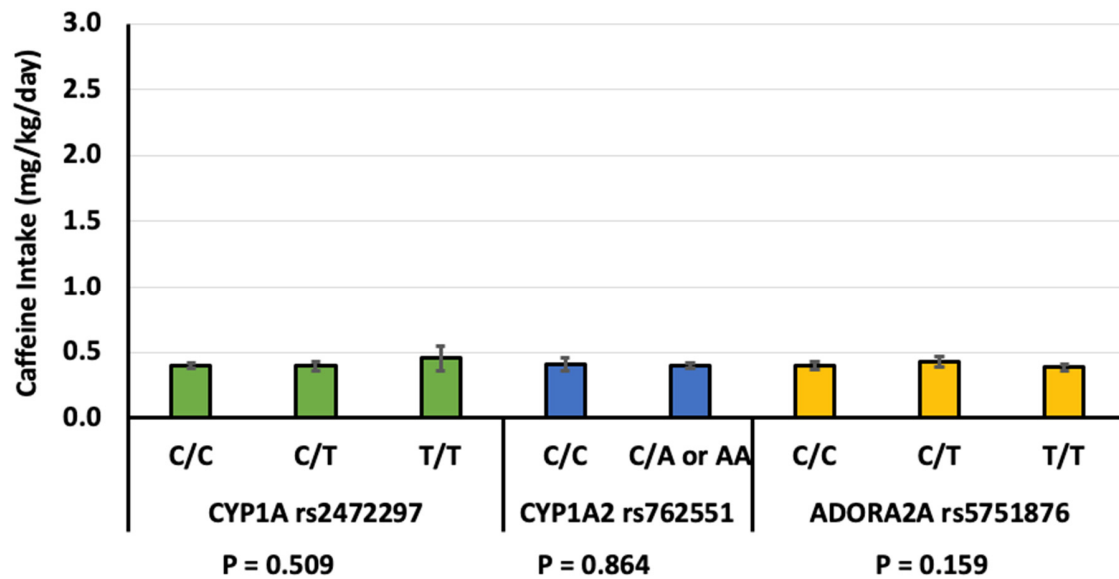

**Figure S1.** Mean caffeine intake by *CYP1A* and *ADORA2A* genotype adjusted for psychotropic use (i.e., SSRIs, antipsychotics, stimulants), gender and population stratification (principal components 1-10). Error bars represent 95% confidence intervals.
